# Supplementary material for: Migration Routes and Staging Areas of Trans-Saharan Turtle Doves Appraised from Light-Level Geolocators
Source: PubMed Central journal article supplement (PMC3609750; doi:10.1371/journal.pone.0059396), 2013-03-27

**Figure S2. Adult Turtle Doves ringed in Oléron Island (Western France) during the breeding season and recovered in foreign countries. Recovery dates are the following: 1) 15 Sept 1999, 2) 02 Sept 2000, 3) 05 Sept 2002, 4) 12 Sept 2002, 5) 24 Sept 2004, 6) 30 Aug 200, 7) 09 Sept 2007.**

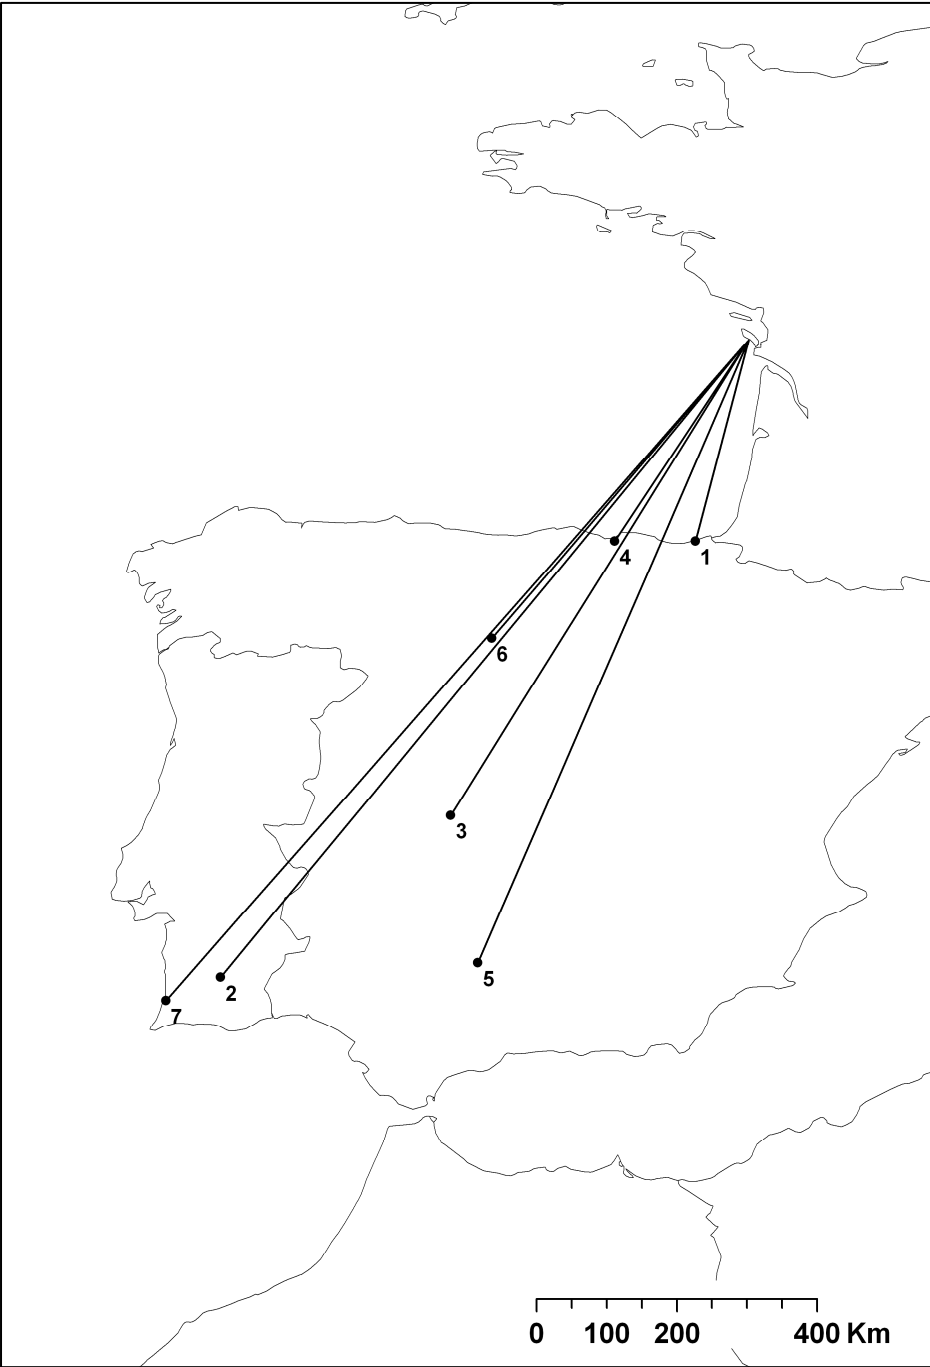

Supplement: pone.0059396.s002.pdf [file pone.0059396.s002.pdf]
