# Supplementary material for: Migration Routes and Staging Areas of Trans-Saharan Turtle Doves Appraised from Light-Level Geolocators
Source: PubMed Central journal article supplement (PMC3609750; doi:10.1371/journal.pone.0059396), 2013-03-27

**Figure S4. Tree cover as the proportion of each grid cell.**

Sources: Derries R, Hansen M, Townshend JRG, Janetos AC, Loveland TR (2000), 1 Kilometer Tree Cover Continuous Fields, 1.0, Department of Geography, University of Maryland, College Park, Maryland, 1992-1993; Defries RS, Hansen MC, Townshend JRG, Janetos AC, Loveland TR (2000) A new global 1-km dataset of percentage of tree cover derived from remote sensing. *Global Change Biol* 6: 247-254. The map was drawn from data downloaded at: Global Land Cover Facility, <http://www.landcover.org/>.

75% kernel contours are shown with one colour assigned to each bird.

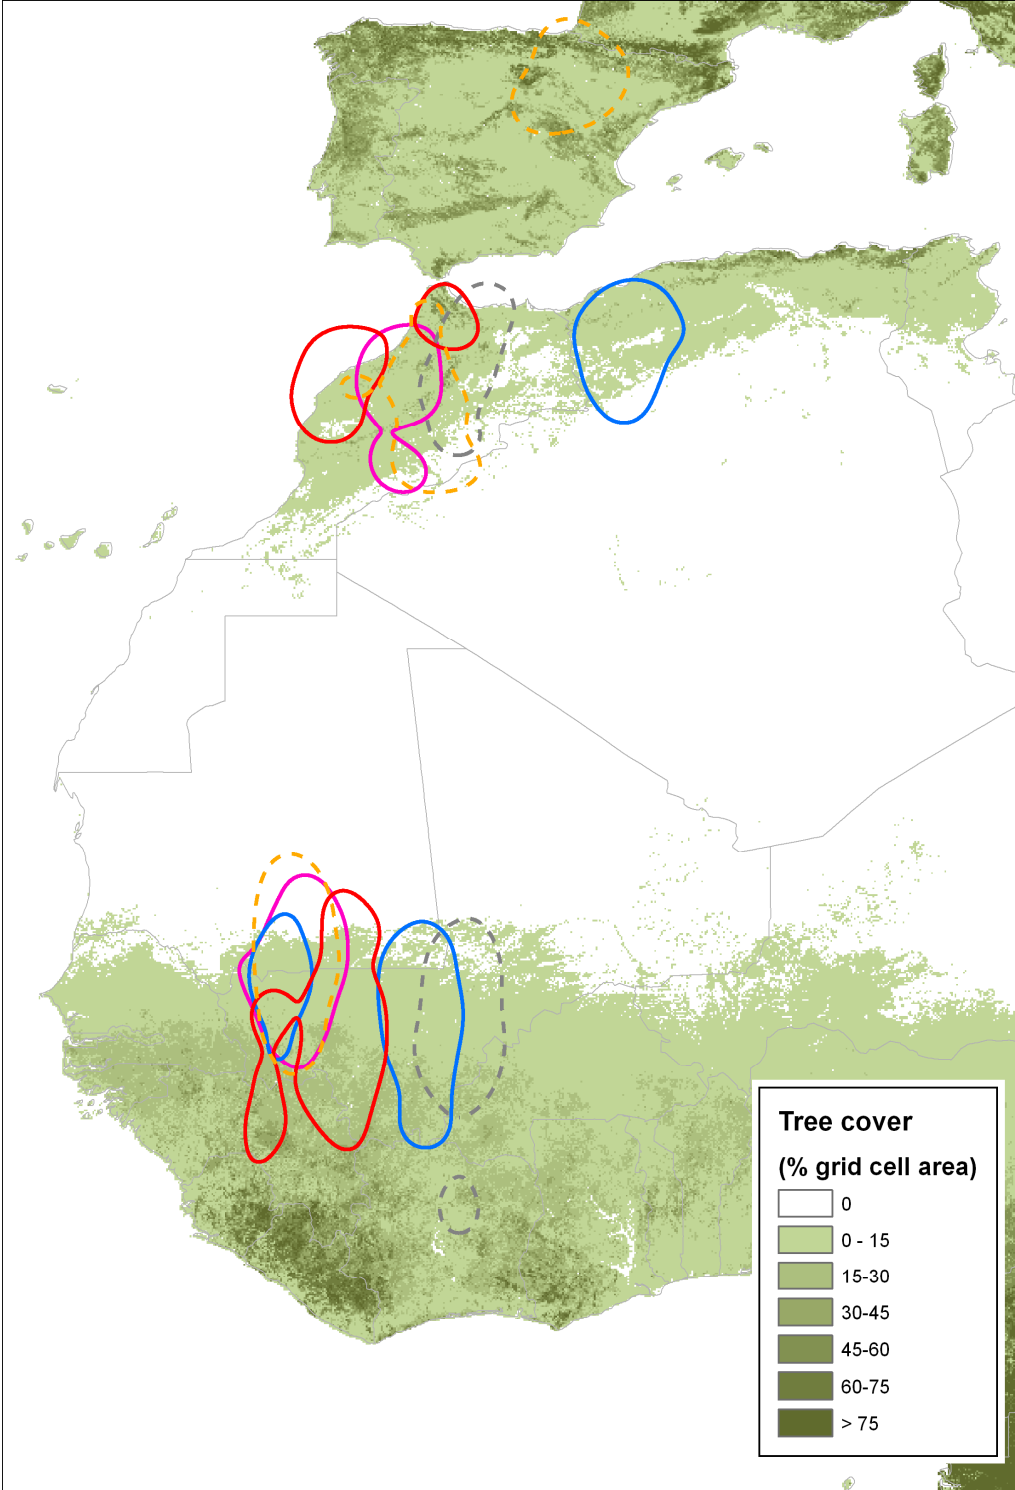

Supplement: pone.0059396.s004.pdf [file pone.0059396.s004.pdf]
