# Supplementary material for: Migration Routes and Staging Areas of Trans-Saharan Turtle Doves Appraised from Light-Level Geolocators
Source: PubMed Central journal article supplement (PMC3609750; doi:10.1371/journal.pone.0059396), 2013-03-27
Supplement: pone.0059396.s005.pdf [file pone.0059396.s005.pdf]

**Figure S5. Known locations of Eurasian Turtle Doves in Western Africa during autumn and winter.**

Data are synthesized from the following sources: **a)** Morel G, Morel M (1988) *Alauda* 56, **b)** Morel G (1987) *Malimbus* 9, **c)** Girard O – ONCFS *unpublished data*, **d)** Boutin J.-M., Girard O – ONCFS *unpublished data*, **e)** Jarry G (1994) *Statut et Biologie de la Tourterelle des Bois. Rapport interne CRBPO, Paris*, **f)** Jarry G, Baillon F (1991) *Hivernage de la Tourterelle des Bois (Streptopelia turtur) au Sénégal : Étude d'une Population dans la Région de Nianing. Rapport interne CRBPO, Paris*. When available, the date and number of birds seen (*in italics*) are given. Observations from **d** and **e** were recorded during field surveys dedicated to waterbirds censuses. Note that all observations do not distinguish between the two subspecies (i.e. *S. t. turtur* and *S. t. arenicola*). For some observations, coordinates were derived from location names cited in the original text. Inland waters are shown in blue (data downloaded at: <http://www.diva-gis.org>).

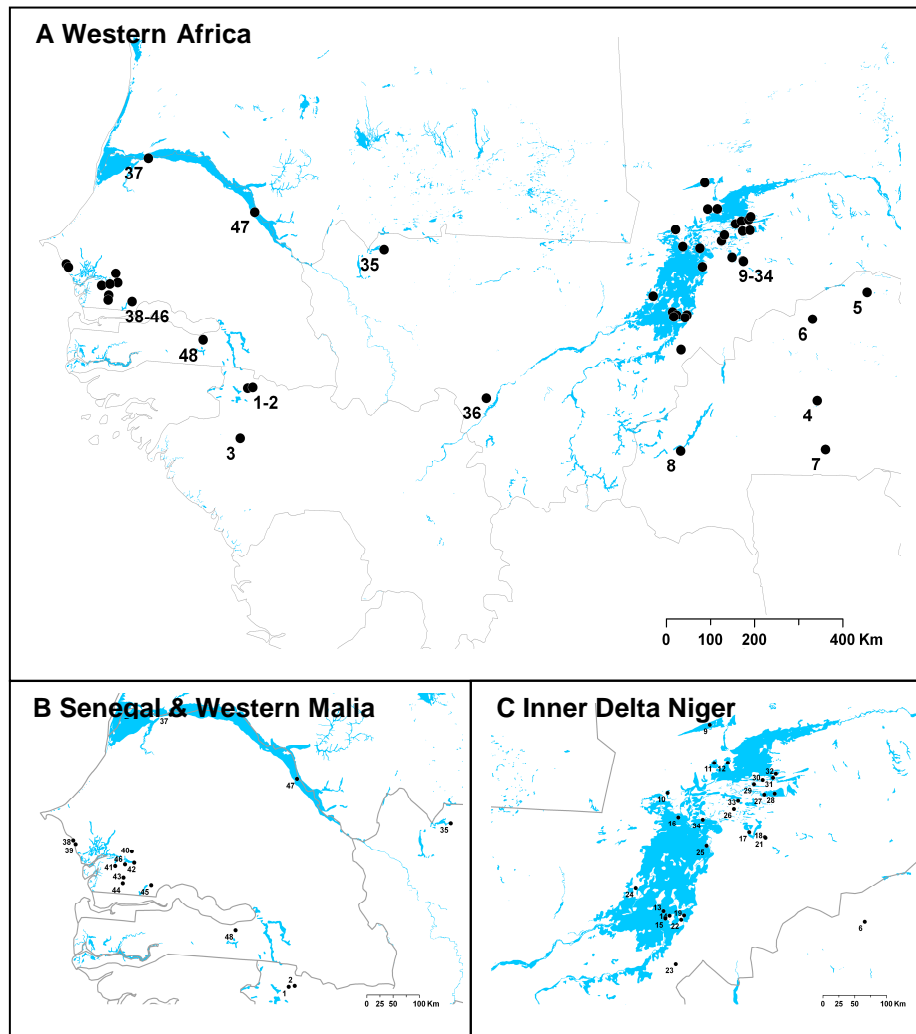

**Guinea** . – 1) 19 Jan 1987 (*small groups*)<sup>a</sup>, 2) 21 Jan 1987<sup>a</sup>, 3) 26 Jan 1987<sup>a</sup>,

**Burkina Faso** . – 4) 8 Nov-6 May (*small groups of 10*)<sup>b</sup>, 5) Oct 1986 (*100 000*)<sup>b</sup>, 6) Apr 1983 (*1000*)<sup>b</sup>, 7) Jan 1983<sup>b</sup>, 8) Jan 1983<sup>b</sup>,

**Mali** . – 9) autumn/winter<sup>b</sup>, 10) autumn/winter<sup>b</sup>, 11) autumn/winter<sup>b</sup>, 12) autumn/winter<sup>b</sup>, 13) 18 Jan 2000 (*100*)<sup>c</sup>, 14) 19 Jan 2000 (*200*)<sup>c</sup>, 15) 19 Jan 2000 (*150*)<sup>c</sup>, 16) 19 Jan 2000 (*1 500*)<sup>c</sup>, 17) 23 Jan 2000 (*3 000*)<sup>c</sup>, 18) 23 Jan 2000 (*500*)<sup>c</sup>, 19-20) 13 Jan 2001 (*500*)<sup>c</sup>, 21) 14 Jan 2001 (*150*)<sup>c</sup>, 22) 14 Jan 2001 (*500*)<sup>c</sup>, 23) 14 Jan 2001 (*700*)<sup>c</sup>, 24) 10 Jan 2008 (*20*)<sup>d</sup>, 25) 11 Jan 2008 (*50*)<sup>d</sup>, 26) 13 Jan 2008 (*120*)<sup>d</sup>, 27) 13 Jan 2008 (*150*)<sup>d</sup>, 28) 13 Jan 2008 (*2 500*)<sup>d</sup>, 29) 13 Jan 2008 (*30*)<sup>d</sup>, 30) 13 Jan 2008 (*500*)<sup>d</sup>, 31) 13 Jan 2008 (*200*)<sup>d</sup>, 32) 13 Jan 2008 (*300*)<sup>d</sup>, 33) 14 Jan 2008 (*400*)<sup>d</sup>, 34) 15 Jan 2008 (*150*)<sup>d</sup>, 35) Mar 1975 (*100 000*)<sup>b</sup>, 36) 10 Jan 2007 (*2 000*)<sup>d</sup>,

**Senegal** . – 37)<sup>e</sup>, 38) 27 Feb 1992 (*20 000*)<sup>e</sup>, 39) 23 Feb 1990 (*50 000*)<sup>f</sup>, 40) 1992<sup>e</sup>, 41) Jan 1994<sup>e</sup>, 42) 07 Mar 1994 (*55 000*)<sup>e</sup>, 43)<sup>e</sup>, 44) (*3 000*)<sup>e</sup>, 45) 25 Mar 1994 (*566 000*)<sup>e</sup>, 46)<sup>e</sup>, 47)<sup>e</sup>, 48)<sup>e</sup>.
